# Supplementary material for: A systematic pipeline for classifying bacterial operons reveals the evolutionary landscape of biofilm machineries
Source: PLoS Comput Biol. 2020 Apr 1;16(4):e1007721. doi: 10.1371/journal.pcbi.1007721 (PMC7112194; doi:10.1371/journal.pcbi.1007721)
Supplement: S4 Table — (XLSX) [file pcbi.1007721.s012.xlsx]

## Sheet: test
S4 Table. Previously Experimentally Characterized EPS Producing Species
Species	EPS Type	References	In Genomes Searched?	Operon Found?	Number of Additional Strains Found	Strain Names
Pseudomonas fluorescens SBW25	Acetylated-Cellulose	PMID: 14507360	Yes	Yes	0
Pseudomonas syringae pv. tomato str. DC3000	Acetylated-Cellulose	PMID: 17014498	Yes	Yes	0
Azotobacter vinelandii DJ	Alginate	PMID: 9397533	Yes	Yes	2	Azotobacter vinelandii CA|Azotobacter vinelandii CA6
Pseudomonas aeruginosa PA14	Alginate	PMID: 11208804	no	no
Pseudomonas aeruginosa PAO1	Alginate	PMID: 11208804	Yes	Yes	17	Pseudomonas aeruginosa UCBPP-PA14|Pseudomonas aeruginosa PA7|Pseudomonas aeruginosa LESB58|Pseudomonas aeruginosa M18|Pseudomonas aeruginosa NCGM2.S1|Pseudomonas aeruginosa DK2|Pseudomonas aeruginosa B136-33|Pseudomonas aeruginosa RP73|Pseudomonas aeruginosa c7447m|Pseudomonas aeruginosa PAO581|Pseudomonas aeruginosa PAO1-VE2|Pseudomonas aeruginosa PAO1-VE13|Pseudomonas aeruginosa PA1R|Pseudomona…
Pseudomonas putida mt-2	Alginate	PMID: 17601783	no	no	11	Pseudomonas putida KT2440|Pseudomonas putida F1|Pseudomonas putida GB-1|Pseudomonas putida W619|Pseudomonas putida S16|Pseudomonas putida BIRD-1|Pseudomonas putida ND6|Pseudomonas putida DOT-T1E|Pseudomonas putida HB3267|Pseudomonas putida H8234|Pseudomonas putida NBRC 14164
Pseudomonas syringae pv. tomato str. DC3000	Alginate	PMID: 10348861	Yes	Yes	2	Pseudomonas syringae pv. phaseolicola 1448A|Pseudomonas syringae pv. syringae B728a
Agrobacterium tumefasciens LBA4213	Cellulose	PMID: 7860586	no	no	0
Anabaena sp.	Cellulose	PMID: 11598227	no	no	0
Azospirillum brasilense Sp7	Cellulose	PMID: 3894333	no	no	0
Azospirillum lipoferum Sp59b	Cellulose	PMID: 3894333	no	no	1	Azospirillum lipoferum 4B
Chromobacter sakazakii ATCC BAA-894	Cellulose	PMID: 29085341	no	no	0
Chromobacterium violaceum ATCC 12472	Cellulose	PMID: 18820969	Yes	Yes	0
Citrobacter freundii	Cellulose	PMID: 12819107	no	no	0
Citrobacter koseri ATCC BAA-895	Cellulose	PMID: 12819107	Yes	Yes	0
Dickeya dadantii Ech703	Cellulose	PMID: 21719543	Yes	Yes	2	Dickeya dadantii Ech586|Dickeya dadantii 3937
E. coli 1094	Cellulose	PMID: 16585767	no	no	0
E. coli Nissile 1917	Cellulose	PMID: 19175667	no	no	0
Enterobacter sp. CJF-082	Cellulose	https://link.springer.com/article/10.1007/s10570-012-9777-2	no	no	2	Enterobacter sp. 638|Enterobacter sp. R4-368
Enterobacter sp. FY-07	Cellulose	PMID: 26911736	no	no
Erwinia chrysanthemi	Cellulose	PMID: 15629935	no	no	0
Escherichia coli str. K-12 substr. MG1655	Cellulose	PMIDs: 11260463, 18599830	Yes	Yes	54	Escherichia coli O157:H7 str. EDL933|Escherichia coli O157:H7 str. Sakai|Escherichia coli CFT073|Escherichia coli str. K-12 substr. W3110|Escherichia coli UTI89|Escherichia coli 536|Escherichia coli APEC O1|Escherichia coli E24377A|Escherichia coli ATCC 8739|Escherichia coli str. K-12 substr. DH10B|Escherichia coli SMS-3-5|Escherichia coli O157:H7 str. EC4115|Escherichia coli SE11|Escherichia col…
Gloeocapsa sp. UTEX L795	Cellulose	PMID: 11598227	no	no	1	Gloeocapsa sp. PCC 7428
Klebsiella pneumoniae ATCC BAA‐1705	Cellulose	PMID: 27185296	no	no	8	Klebsiella pneumoniae subsp. pneumoniae MGH 78578|Klebsiella pneumoniae 342|Klebsiella pneumoniae subsp. pneumoniae NTUH-K2044|Klebsiella pneumoniae subsp. pneumoniae HS11286|Klebsiella pneumoniae KCTC 2242|Klebsiella pneumoniae subsp. pneumoniae 1084|Klebsiella pneumoniae JM45|Klebsiella pneumoniae CG43
Komagataeibacter/Gluconacetobacter xylinus E25	Cellulose	PMID: 18990795	no	no	0
Methylobacterium extorquens PA1	Cellulose	PMID: 23646164	Yes	Yes	3	Methylobacterium extorquens CM4|Methylobacterium extorquens AM1|Methylobacterium extorquens DM4
Nostoc muscorum UTEX 2209	Cellulose	PMID: 11598227	no	no	0
Nostoc punctiforme ATCC 29133	Cellulose	PMID: 11598227	no	no	0
Oscillatoria sp. UTEX L2435	Cellulose	PMID: 11598227	no	no	0
Phormidium autumnale	Cellulose	PMID: 11598227	no	no	0
Rhizobium leguminosarum bv. Viciae 3841	Cellulose	PMID: 15986922	no	no	3	Rhizobium leguminosarum bv. viciae 3841|Rhizobium leguminosarum bv. trifolii WSM2304|Rhizobium leguminosarum bv. trifolii WSM1325
Rhodobacter sphaeroides 2.4.1	Cellulose	PMID: 24127606	no	no
Rhodobacter sphaeroides ATCC 17025	Cellulose	PMID: 19966004	Yes	Yes	2	Rhodobacter sphaeroides ATCC 17029|Rhodobacter sphaeroides KD131
Salmonella enterica subsp. Enterica serovar Typhimurium ATCC14028	Cellulose	https://link.springer.com/article/10.1023/B:CELL.0000046411.74345.8f	no	no	40	Salmonella enterica subsp. enterica serovar Typhimurium str. LT2|Salmonella enterica subsp. enterica serovar Typhi str. CT18|Salmonella enterica subsp. enterica serovar Typhi str. Ty2|Salmonella enterica subsp. arizonae serovar 62:z4,z23:- str.|Salmonella enterica subsp. enterica serovar Paratyphi B str. SPB7|Salmonella enterica subsp. enterica serovar Newport str. SL254|Salmonella enterica subsp…
Scytonema hofmanni	Cellulose	PMID: 11598227	no	no	0
Synechococcus sp. PCC7002	Cellulose	PMID: 27462405	no	no	0
Acidithiobacillus thiooxidans ATCC 19377	Pel	PMID: 29466318	no	no	0
Pseudomonas aeruginosa PA14	Pel	PMID:15758243, PMID: 12810959	no	no
Pseudomonas aeruginosa PAO1	Pel	PMID:15758243, PMID: 12810959	Yes	Yes	17	Pseudomonas aeruginosa UCBPP-PA14|Pseudomonas aeruginosa PA7|Pseudomonas aeruginosa LESB58|Pseudomonas aeruginosa M18|Pseudomonas aeruginosa NCGM2.S1|Pseudomonas aeruginosa DK2|Pseudomonas aeruginosa B136-33|Pseudomonas aeruginosa RP73|Pseudomonas aeruginosa c7447m|Pseudomonas aeruginosa PAO581|Pseudomonas aeruginosa PAO1-VE2|Pseudomonas aeruginosa PAO1-VE13|Pseudomonas aeruginosa PA1R|Pseudomona…
Ralstonia solanacearum GMI1000	Pel	PMID:15758243	Yes	Yes	5	Ralstonia solanacearum CFBP2957|Ralstonia solanacearum PSI07|Ralstonia solanacearum CMR15|Ralstonia solanacearum Po82|Ralstonia solanacearum FQY_4
Acinetobacter baumannii S1	PNAG	PMID: 19633088	no	no	15	Acinetobacter baumannii ATCC 17978|Acinetobacter baumannii AYE|Acinetobacter baumannii ACICU|Acinetobacter baumannii AB0057|Acinetobacter baumannii AB307-0294|Acinetobacter baumannii 1656-2|Acinetobacter baumannii MDR-ZJ06|Acinetobacter baumannii TCDC-AB0715|Acinetobacter baumannii MDR-TJ|Acinetobacter baumannii TYTH-1|Acinetobacter baumannii D1279779|Acinetobacter baumannii BJAB07104|Acinetobact…
Actinobacillus pleuropneumoniae IA1	PNAG	PMID: 15576769	no	no	3	Actinobacillus pleuropneumoniae serovar 5b str. L20|Actinobacillus pleuropneumoniae serovar 3 str. JL03|Actinobacillus pleuropneumoniae serovar 7 str. AP76
Aggregatibacter actinomycetemcomitans IDH 781	PNAG	PMID: 28548373	no	no	3	Aggregatibacter actinomycetemcomitans D11S-1|Aggregatibacter actinomycetemcomitans ANH9381|Aggregatibacter actinomycetemcomitans D7S-1
Bordetella bronchiseptica RB50	PNAG	PMID: 17114249	Yes	Yes	2	Bordetella bronchiseptica MO149|Bordetella bronchiseptica 253
Bordetella parapertussis 12822	PNAG	PMID: 17114249	Yes	Yes	1	Bordetella parapertussis Bpp5
Bordetella pertussis BP530 (Derived from Tahoma I [PMID: 12933835])	PNAG	PMID: 17114249	no	no	3	Bordetella pertussis Tohama I|Bordetella pertussis CS|Bordetella pertussis 18323
Burkholderia ambifaria LM619467	PNAG	PMID: 21984237	no	no	1	Burkholderia ambifaria AMMD
Burkholderia cepacia ATCC25416	PNAG	PMID: 21984237	no	no	1	Burkholderia cepacia GG4
Burkholderia multivorans C5393	PNAG	PMID: 21984237	no	no	1	Burkholderia multivorans ATCC 17616
Burkholderia vietnamiensis LM618835	PNAG	PMID: 21984237	no	no	1	Burkholderia vietnamiensis G4
Enterobacter cloacae	PNAG	PMID: 26747103	no	no	5	Enterobacter cloacae subsp. cloacae ATCC 13047|Enterobacter cloacae EcWSU1|Enterobacter cloacae subsp. dissolvens SDM|Enterobacter cloacae subsp. cloacae ENHKU01|Enterobacter cloacae subsp. cloacae NCTC 9394
Escherichia coli str. K-12 substr. MG1655	PNAG	PMID: 15090514	Yes	Yes	47	Escherichia coli O157:H7 str. EDL933|Escherichia coli O157:H7 str. Sakai|Escherichia coli CFT073|Escherichia coli str. K-12 substr. W3110|Escherichia coli UTI89|Escherichia coli 536|Escherichia coli APEC O1|Escherichia coli HS|Escherichia coli E24377A|Escherichia coli ATCC 8739|Escherichia coli str. K-12 substr. DH10B|Escherichia coli O157:H7 str. EC4115|Escherichia coli SE11|Escherichia coli S88…
Klebsiella pneumoniae CG43	PNAG	PMID: 25450884	Yes	Yes	7	Klebsiella pneumoniae subsp. pneumoniae MGH 78578|Klebsiella pneumoniae 342|Klebsiella pneumoniae subsp. pneumoniae NTUH-K2044|Klebsiella pneumoniae subsp. pneumoniae HS11286|Klebsiella pneumoniae KCTC 2242|Klebsiella pneumoniae subsp. pneumoniae 1084|Klebsiella pneumoniae JM45
Staphylococcus aureus MN8	PNAG	PMID: 16177366	no	no	41	Staphylococcus aureus subsp. aureus N315|Staphylococcus aureus subsp. aureus Mu50|Staphylococcus aureus subsp. aureus COL|Staphylococcus aureus subsp. aureus MRSA252|Staphylococcus aureus subsp. aureus MSSA476|Staphylococcus aureus subsp. aureus MW2|Staphylococcus aureus RF122|Staphylococcus aureus subsp. aureus USA300_FPR3757|Staphylococcus aureus subsp. aureus NCTC 8325|Staphylococcus aureus su…
Staphylococcus aureus NCTC 10833	PNAG	PMID: 25450884	no	no
Staphylococcus aureus Newman	PNAG	PMID: 25450884	no	no
Staphylococcus epidermidis 1457	PNAG	PMIDs: 1314224, 8550413	no	no	1	Staphylococcus epidermidis RP62A
Staphylococcus epidermidis RP62A	PNAG	PMID: 17635864	Yes	Yes	0
Staphylococcus lugdunensis IDRL-856, IDRL-5254, IDRL-5258	PNAG	PMID: 17635864	no	no	2	Staphylococcus lugdunensis HKU09-01|Staphylococcus lugdunensis N920143
Stenotrophomonas maltophilia	PNAG	PMID: 26918288	no	no	4	Stenotrophomonas maltophilia K279a|Stenotrophomonas maltophilia R551-3|Stenotrophomonas maltophilia JV3|Stenotrophomonas maltophilia D457
Yersinia pestis KIM6+	PNAG	PMID: 9249062	no	no	8	Yersinia pestis CO92|Yersinia pestis KIM10+|Yersinia pestis biovar Microtus str. 91001|Yersinia pestis Antiqua|Yersinia pestis Pestoides F|Yersinia pestis Angola|Yersinia pestis D106004|Yersinia pestis D182038
